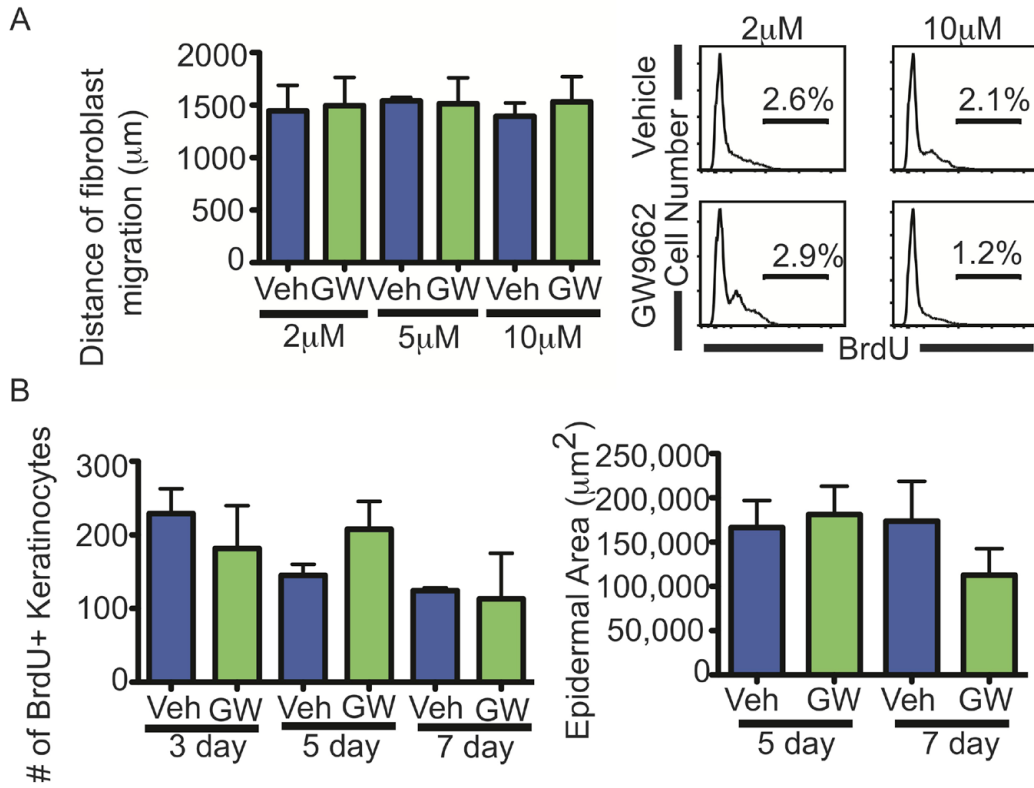

**Fig. S1. GW9662 treatment does not directly affect fibroblasts *in vitro* or keratinocytes *in vivo*.** (A) *In vitro* analysis of primary fibroblasts shows that fibroblast proliferation and migration are the same when cultured with vehicle or GW9662 at the indicated concentrations. (B) The number of BrdU<sup>+</sup> keratinocytes is the same in GW9662-injected mouse wounds and vehicle-injected controls at 3, 5 or 7 days after wounding. Additionally, the epidermal area is unchanged following GW9662 injection, indicating normal re-epithelialization.

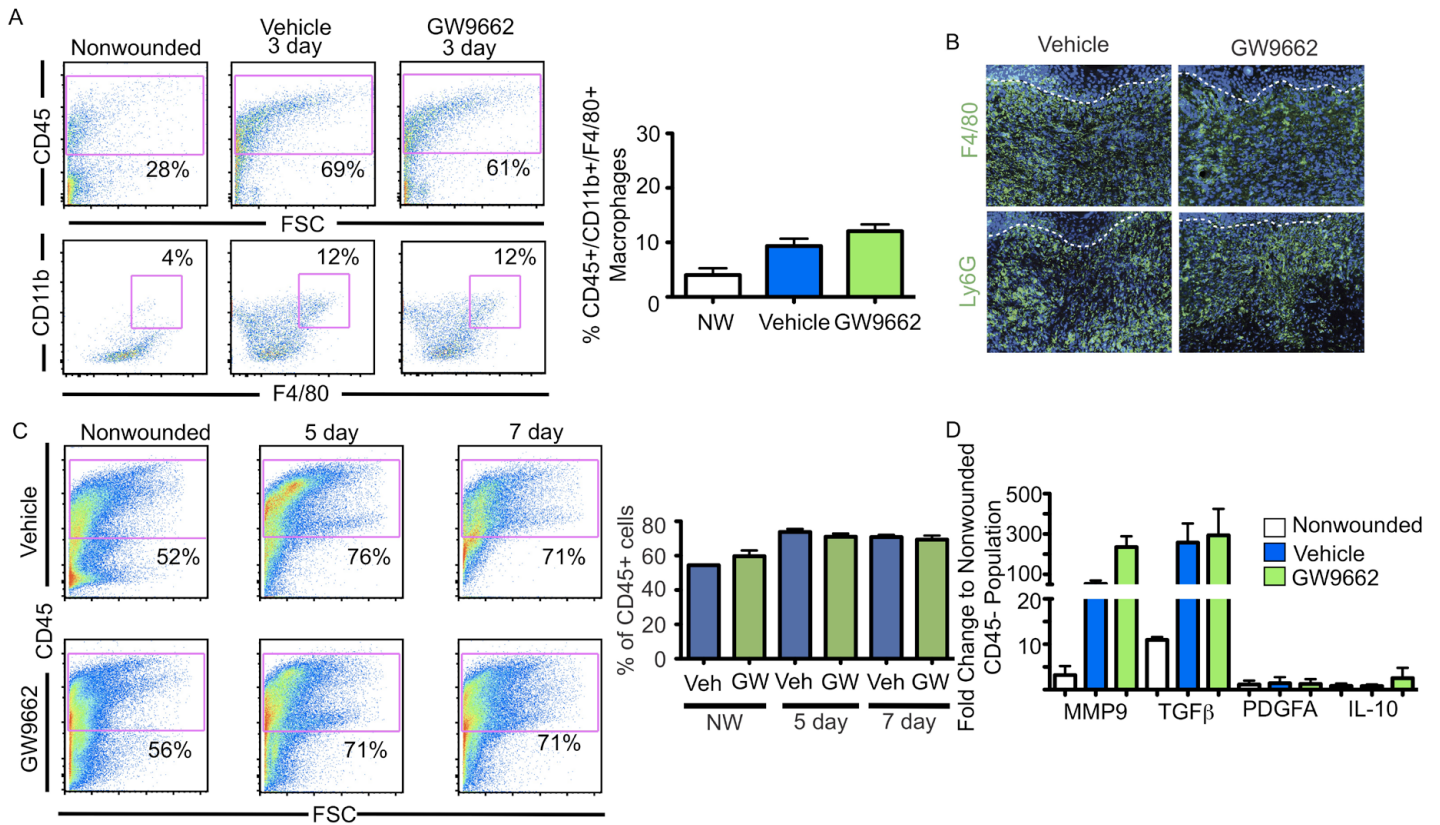

**Fig. S2. Analysis of macrophages in GW9662-treated mice after wounding.** (A) FACS analysis of CD45<sup>+</sup>/CD11b<sup>+</sup>/F4/80<sup>+</sup> macrophages at 3 days after wounding. Percentage of CD45<sup>+</sup>/CD11b<sup>+</sup>/F4/80<sup>+</sup> cells is similar in vehicle-injected and GW9662-injected mouse wounds. (B) Immune cell populations are recruited in GW9662-injected wounds compared with vehicle controls at 3 days after wounding. Macrophage populations can be seen in skin sections of both wounds using F4/80, and neutrophils infiltrate wounded skin normally in both samples as seen by LY6G immunostaining. Dotted lines indicate the epidermal-dermal boundary. Asterisk indicates background staining in epidermis. (C) FACS analysis of CD45<sup>+</sup> cells shows no difference in immune cell percentage of vehicle- and GW9662-injected mouse wounds at 5 or 7 days after wounding. (D) Fold changes of mRNA levels of CD45<sup>+</sup>/CD11b<sup>+</sup>/F4/80<sup>+</sup> macrophages compared with non-wounded CD45<sup>-</sup> controls isolated from non-wounded skin, vehicle-injected wounds and GW9662-injected wounds are similar for several macrophage-produced cytokines.

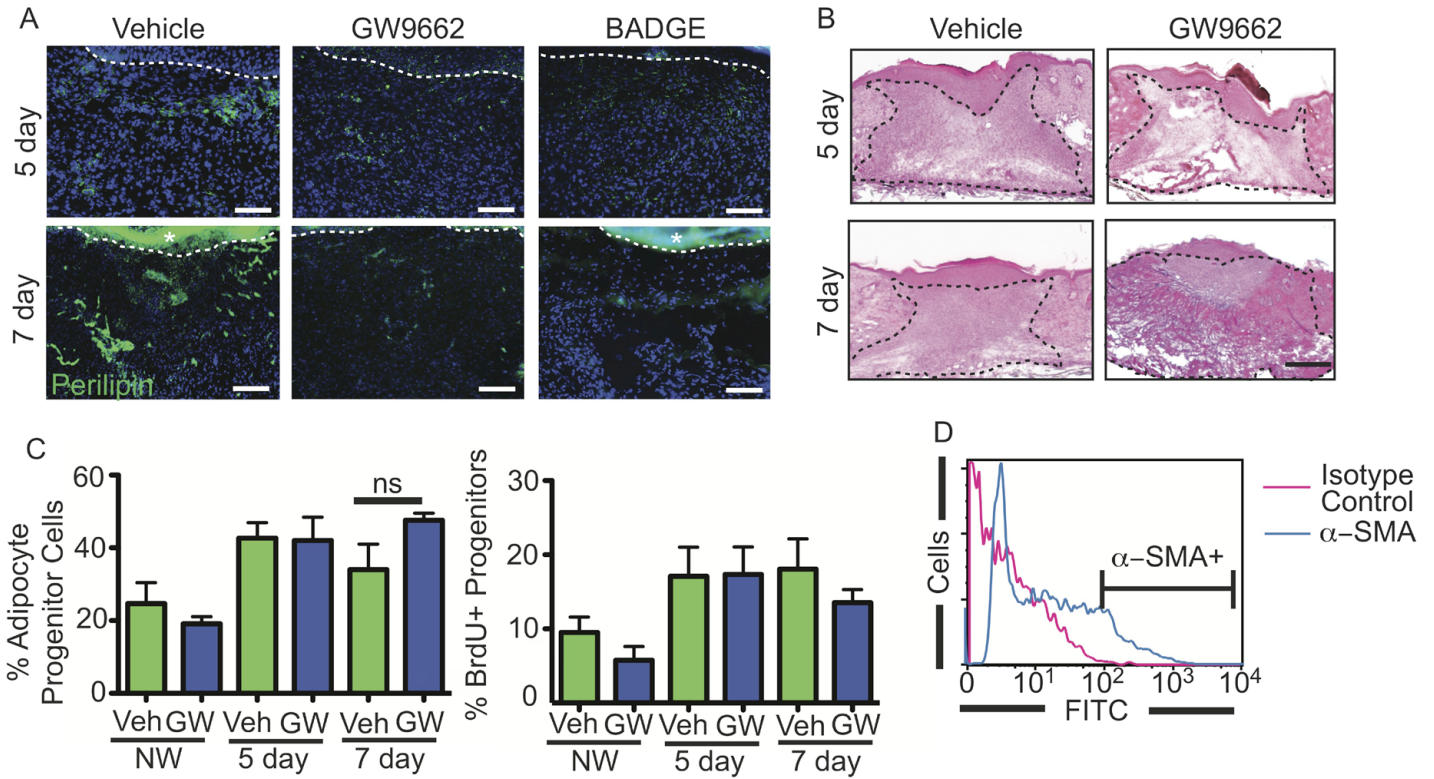

**Fig. S3. Effect of GW9662 treatment on adipocyte lineage cells during wounding.** (A) Lack of perilipin<sup>+</sup>, mature adipocytes (green) in wounds of GW9662-injected and BADGE-injected mice 5 and 7 days after wounding compared with vehicle-injected mice as indicated. Dotted line indicates epidermal-dermal boundary. Asterisk indicates background staining. Scale bar: 100  $\mu$ m. (B) H&E-stained skin sections of vehicle-injected and GW9662-injected wounds at 5 and 7 days after wounding showing abnormal dermal morphology. Dotted line outlines dermal wound bed. Scale bar: 200  $\mu$ m. (C) The percentage of BrdU<sup>+</sup> adipocyte progenitor cells is the same in GW9662-injected mice compared with the vehicle-injected control mice at 5 and 7 days after wounding. The percentage of adipocyte progenitor cells within the Lin<sup>-</sup>, CD34<sup>+</sup>, CD29<sup>+</sup> cell population is the same in GW9662-treated mice compared with vehicle-injected controls. (D) FACS histogram plots of dermal cells isolated from skin wounds at day 5 stained with IgG2a-FITC (isotype control) or  $\alpha$ -SMA-FITC antibodies. Line indicates + gate for  $\alpha$ -SMA staining used in Fig. 4C.
